# Supplementary material for: Comparison of Japanese and Indian intestinal microbiota shows diet-dependent interaction between bacteria and fungi
Source: PubMed Central journal article supplement (PMC6925221; doi:10.1038/s41522-019-0110-9), 2019-12-20

Supplementary Table1 Specificity check of *Candida* and *Prevotella copri* primers.

| Microorganism                       | Strain No.        | <i>Candida_albicans</i><br>_138Fw/234Rv | Ctro/UNI2 | PCFw/PCRv        |
|-------------------------------------|-------------------|-----------------------------------------|-----------|------------------|
| <i>Candida albicans</i>             | IFM 40009         | +                                       | -         | NT <sup>1)</sup> |
| <i>Candida dubliniensis</i>         | IFM 48313         | +                                       | -         | NT               |
| <i>Candida tropicalis</i>           | IFM 61949         | -                                       | +         | NT               |
| <i>Candida glabrata</i>             | IFM 5768          | -                                       | -         | NT               |
| <i>Aspergillus fumigatus</i>        | IFM 54229         | -                                       | -         | NT               |
| <i>Aspergillus flavus</i>           | IFM 61916         | -                                       | -         | NT               |
| <i>Aspergillus niger</i>            | IFM 62238         | -                                       | -         | NT               |
| <i>Aspergillus terreus</i>          | IFM 61604         | -                                       | -         | NT               |
| <i>Acremonium alternatum</i>        | IFM 61908         | -                                       | -         | NT               |
| <i>Cladosporium cladosporioides</i> | IFM 62110         | -                                       | -         | NT               |
| <i>Cladosporium herbarum</i>        | IFM 57770         | -                                       | -         | NT               |
| <i>Cryptococcus neoformans</i>      | IFM 46660         | -                                       | -         | NT               |
| <i>Cryptococcus aureus</i>          | IFM 50258         | -                                       | -         | NT               |
| <i>Fusarium oxysporum</i>           | IFM 62224         | -                                       | -         | NT               |
| <i>Fusarium solani</i>              | IFM 62065         | -                                       | -         | NT               |
| <i>Penicillium oxalicum</i>         | IFM 49446         | -                                       | -         | NT               |
| <i>Penicillium digitatum</i>        | IFM 60598         | -                                       | -         | NT               |
| <i>Penicillium chrysogenum</i>      | IFM 61632         | -                                       | -         | NT               |
| <i>Penicillium citrinum</i>         | IFM 62178         | -                                       | -         | NT               |
| <i>Trichoderma viride</i>           | IFM 51186         | -                                       | -         | NT               |
| <i>Trichoderma koningii</i>         | IFM 51050         | -                                       | -         | NT               |
| <i>Mucor ramosissimus</i>           | IFM 47659         | -                                       | -         | NT               |
| <i>Rhizopus oryzae</i>              | IFM 47055         | -                                       | -         | NT               |
| <i>Saccharomyces cerevisiae</i>     | IFM 40022         | -                                       | -         | NT               |
| <i>Rhodotorula mucilaginosa</i>     | IFM 40060         | -                                       | -         | NT               |
| <i>Rhodospiridium babjevae</i>      | IFM 48570         | -                                       | -         | NT               |
| <i>Prevotella copri</i>             | JCM 13464         | NT                                      | NT        | +                |
| <i>Prevotella copri</i>             | Indian #31        | NT                                      | NT        | +                |
| <i>Prevotella copri</i>             | Indian #38        | NT                                      | NT        | +                |
| <i>Prevotella copri</i>             | Indian #7         | NT                                      | NT        | -                |
| <i>Prevotella copri</i>             | Japanese F37      | NT                                      | NT        | +                |
| <i>Prevotella copri</i>             | Japanese N001-8-1 | NT                                      | NT        | -                |
| <i>Prevotella copri</i>             | Japanese N0165    | NT                                      | NT        | -                |
| <i>Prevotella corporis</i>          | JCM 8529          | NT                                      | NT        | -                |
| <i>Aeromonas hydrophila</i>         | NBRC 3820         | NT                                      | NT        | -                |
| <i>Bacteroides fragilis</i>         | JCM 11019         | NT                                      | NT        | -                |
| <i>Bacteroides sartorii</i>         | JCM 17136         | NT                                      | NT        | -                |
| <i>Bacteroides vulgatus</i>         | JCM 5826          | NT                                      | NT        | -                |
| <i>Bifidobacterium longum</i>       | JCM 1217          | NT                                      | NT        | -                |
| <i>Blautia producta</i>             | JCM 1471          | NT                                      | NT        | -                |
| <i>Citrobacter koseri</i>           | JCM 1658          | NT                                      | NT        | -                |
| <i>Collinsella intestinalis</i>     | JCM 10643         | NT                                      | NT        | -                |
| <i>Escherichia coli</i>             | JCM 1649          | NT                                      | NT        | -                |
| <i>Eubacterium dolichum</i>         | JCM 10413         | NT                                      | NT        | -                |
| <i>Fusobacterium varium</i>         | JCM 6320          | NT                                      | NT        | -                |
| <i>Lactobacillus acidophilus</i>    | JCM 1132          | NT                                      | NT        | -                |
| <i>Lactobacillus gasseri</i>        | JCM 1131          | NT                                      | NT        | -                |

<sup>1)</sup> NT, Not tested.

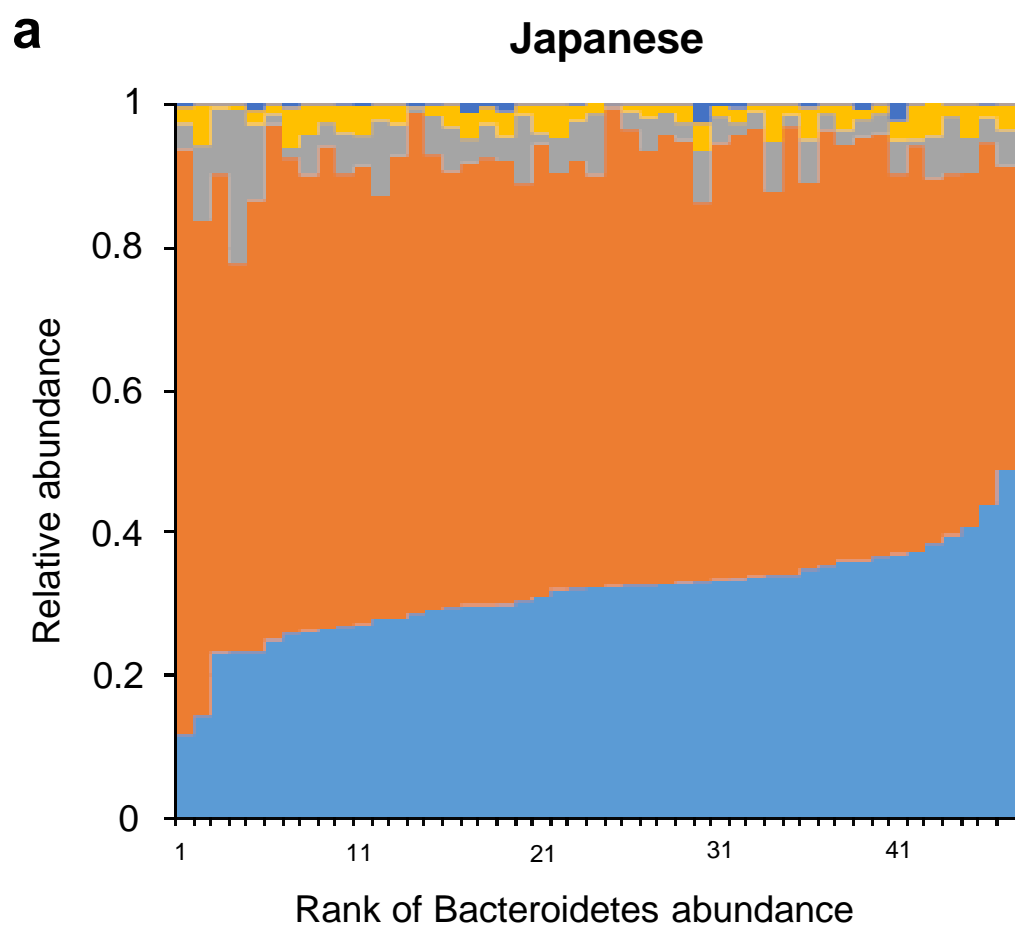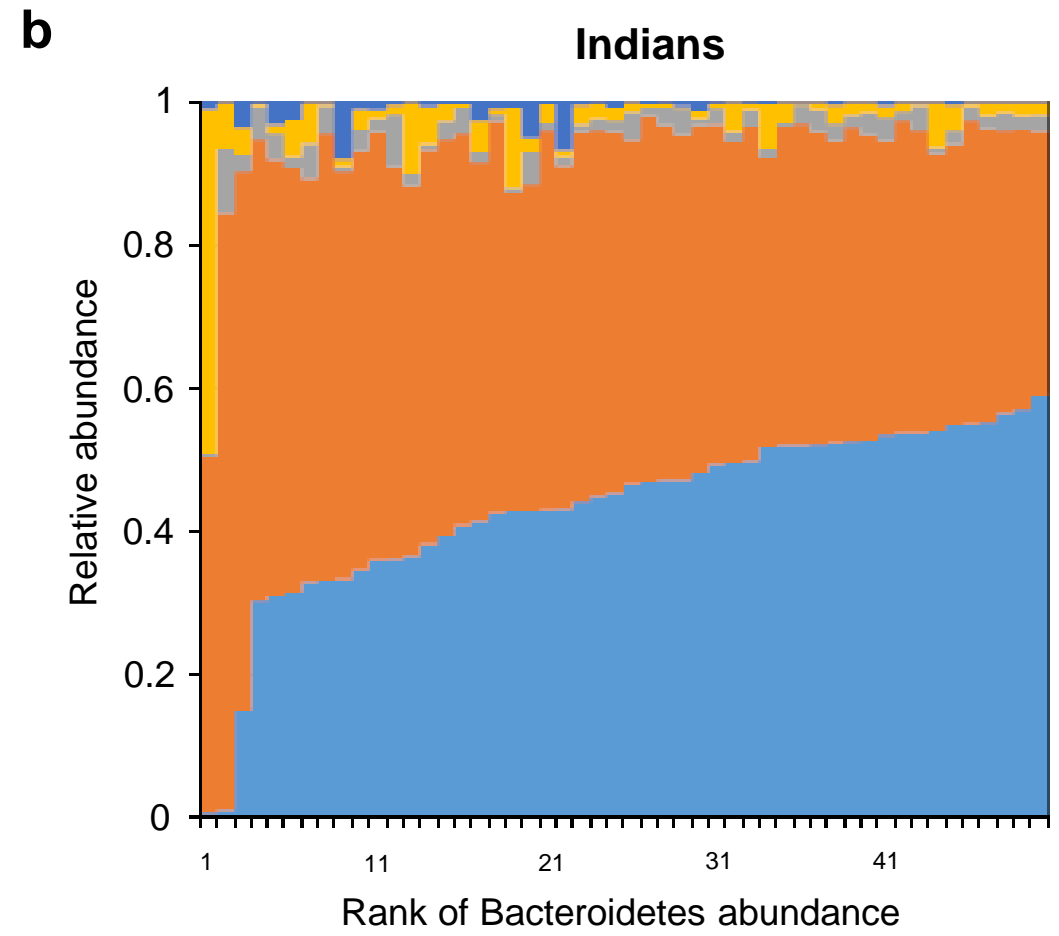

■ Bacteroidetes ■ Firmicutes ■ Actinobacteria ■ Proteobacteria ■ Others

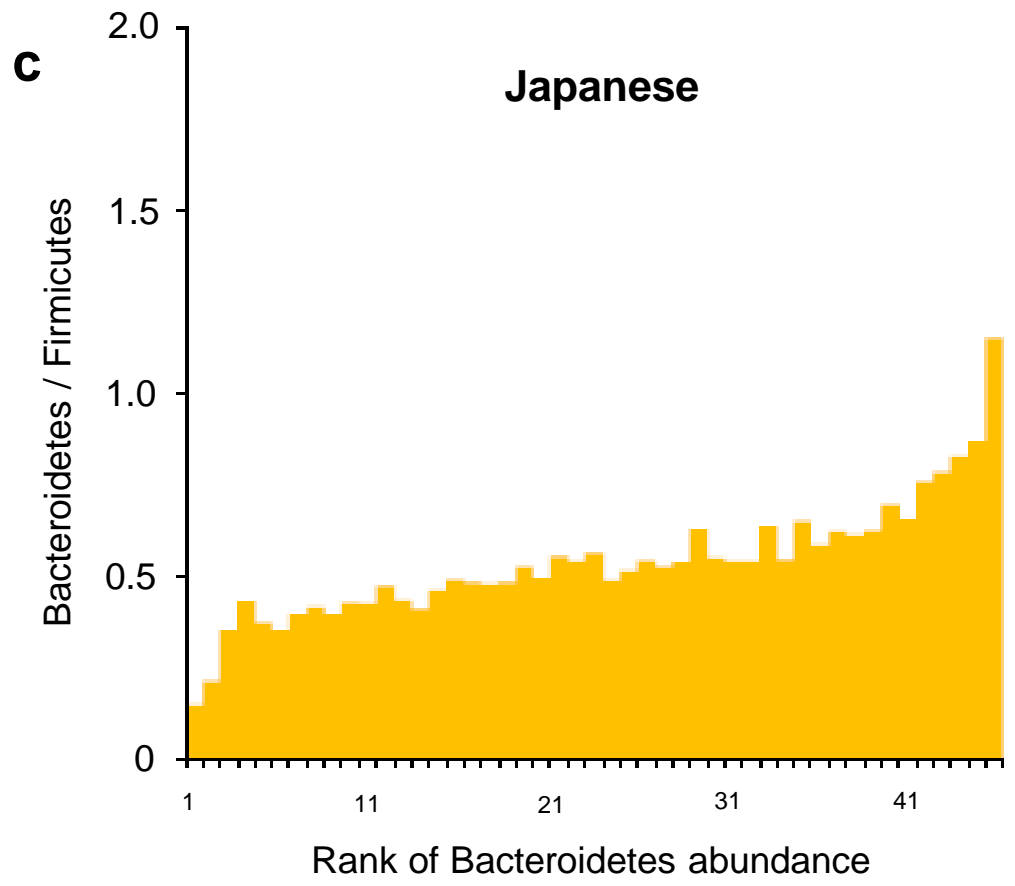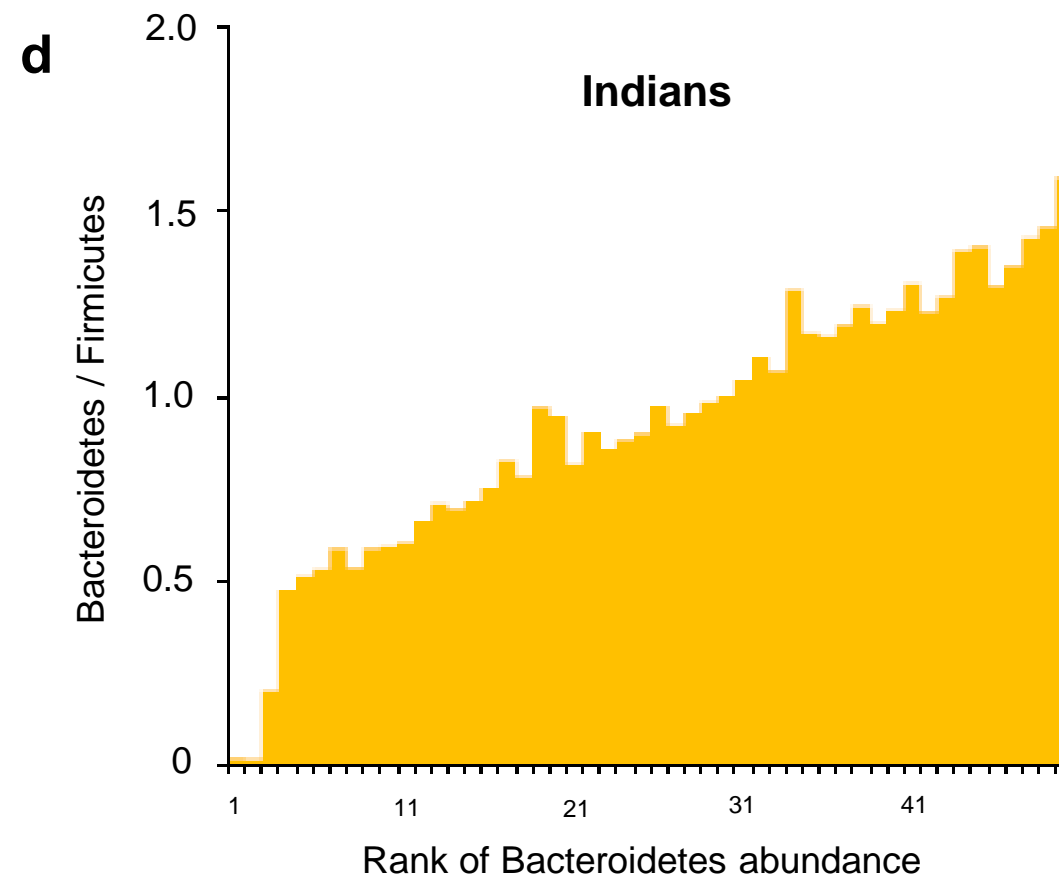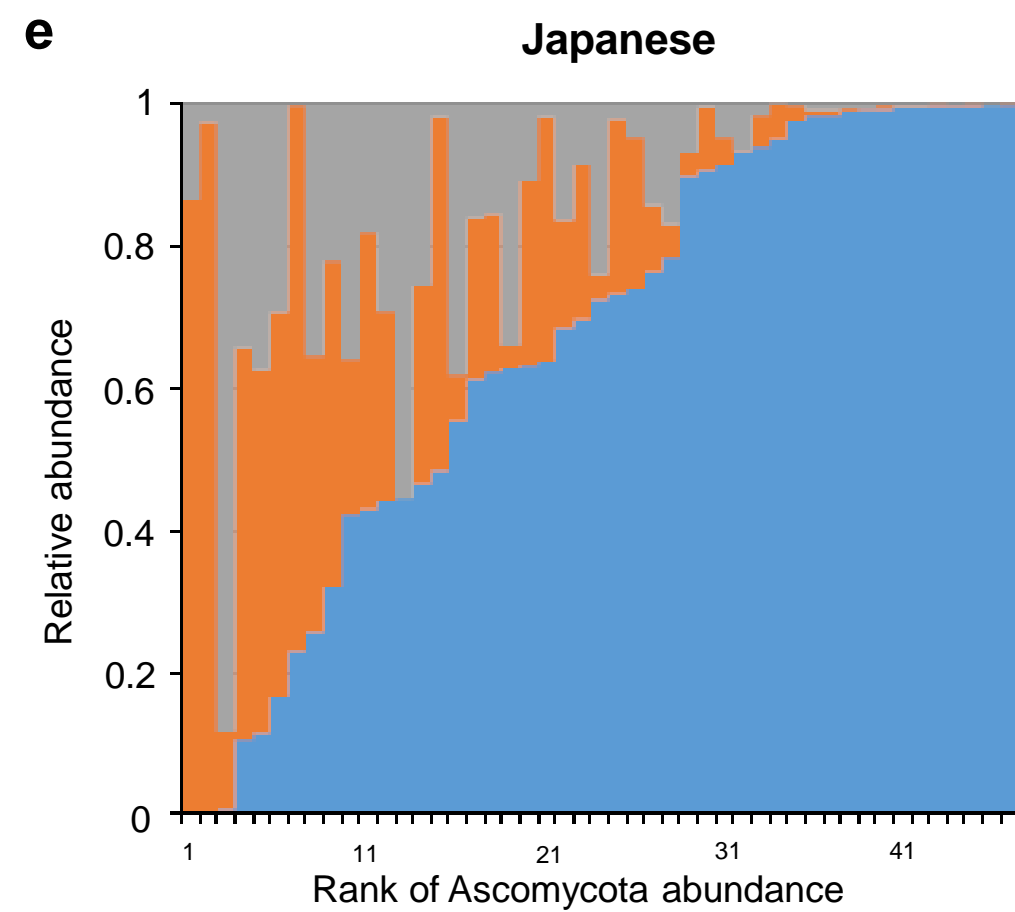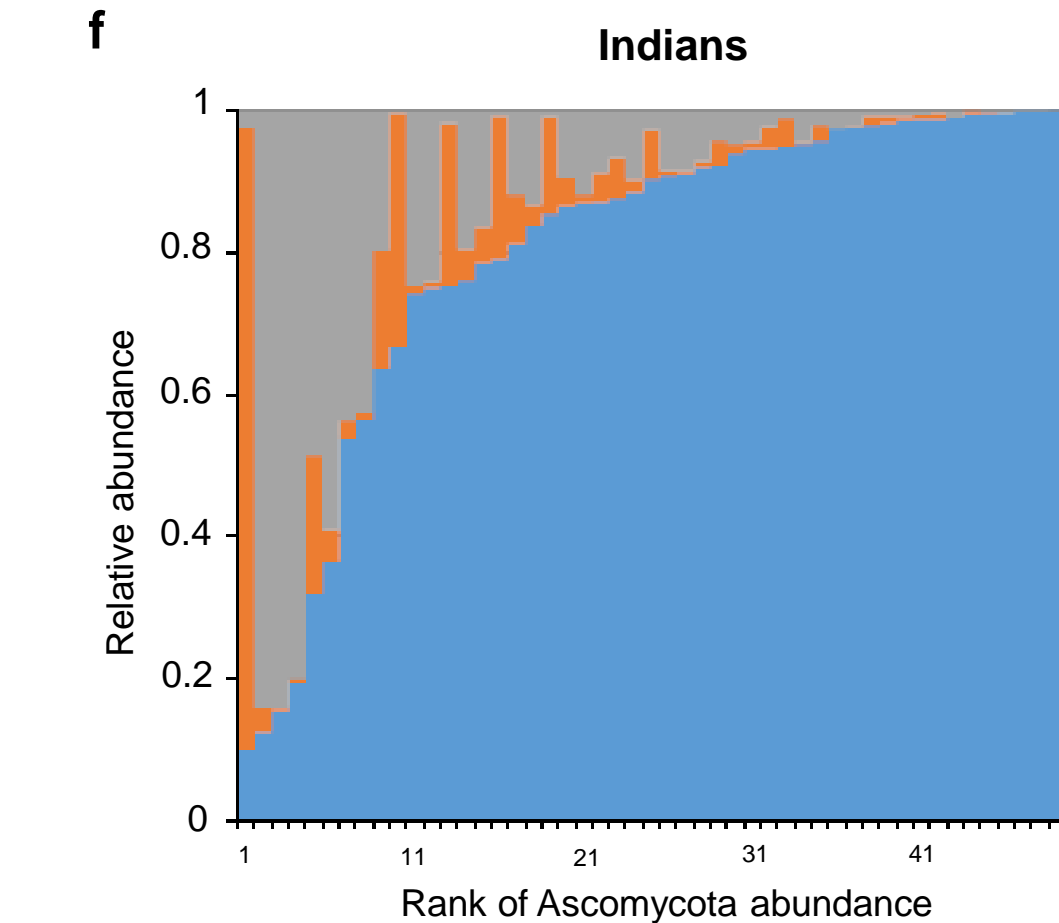

■ Ascomycota ■ Basidiomycota ■ Others

a

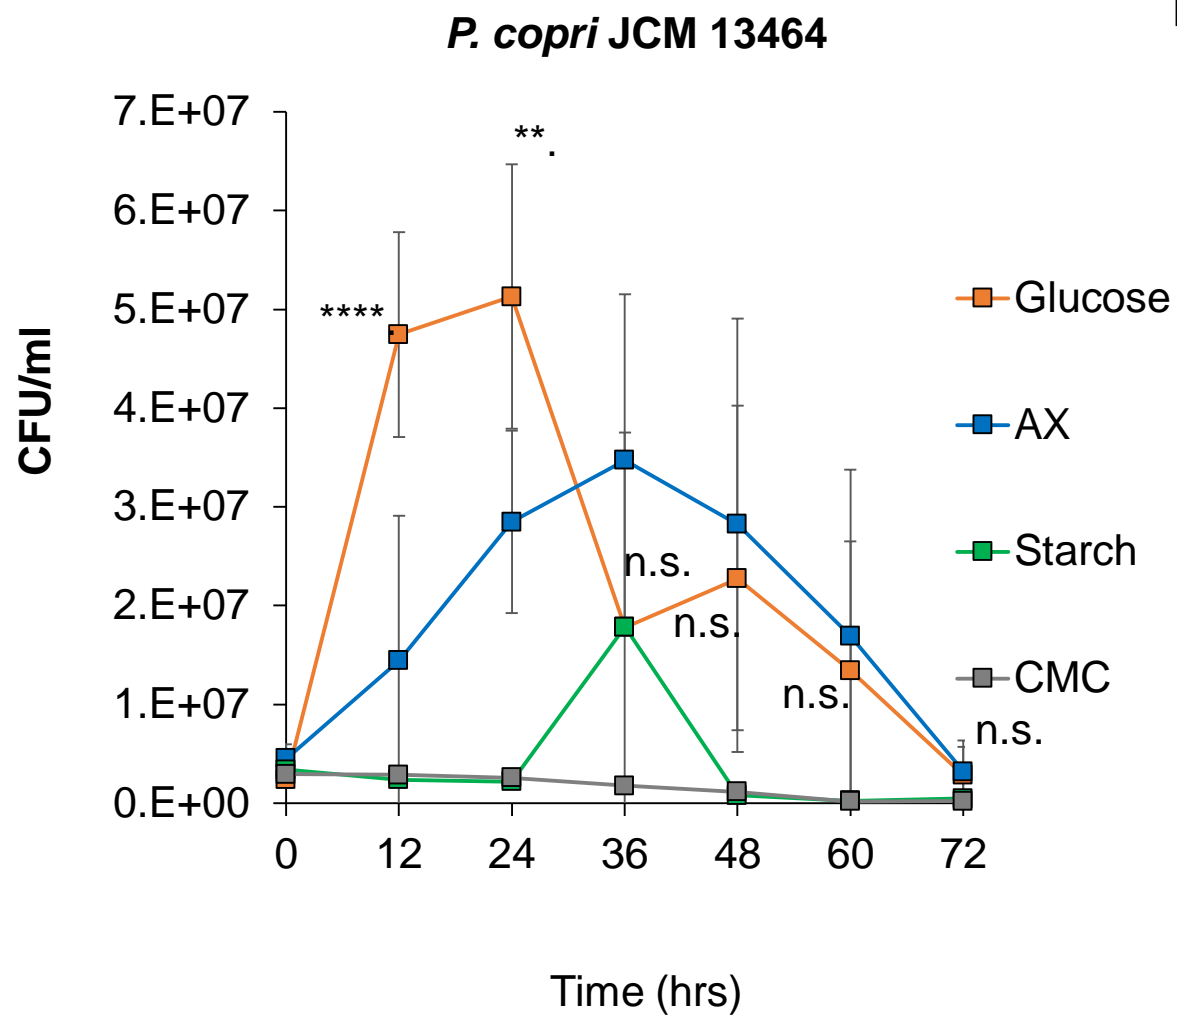

b

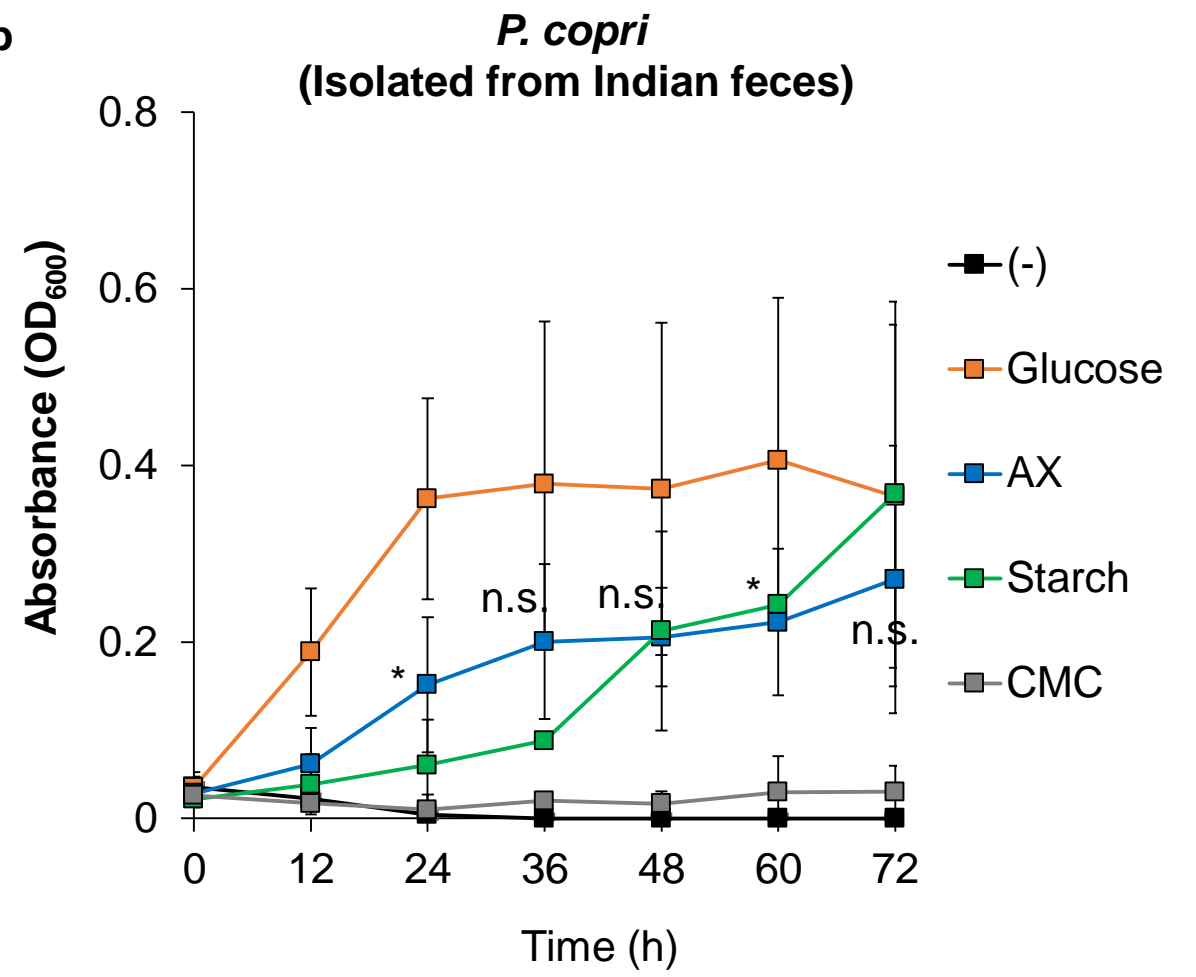

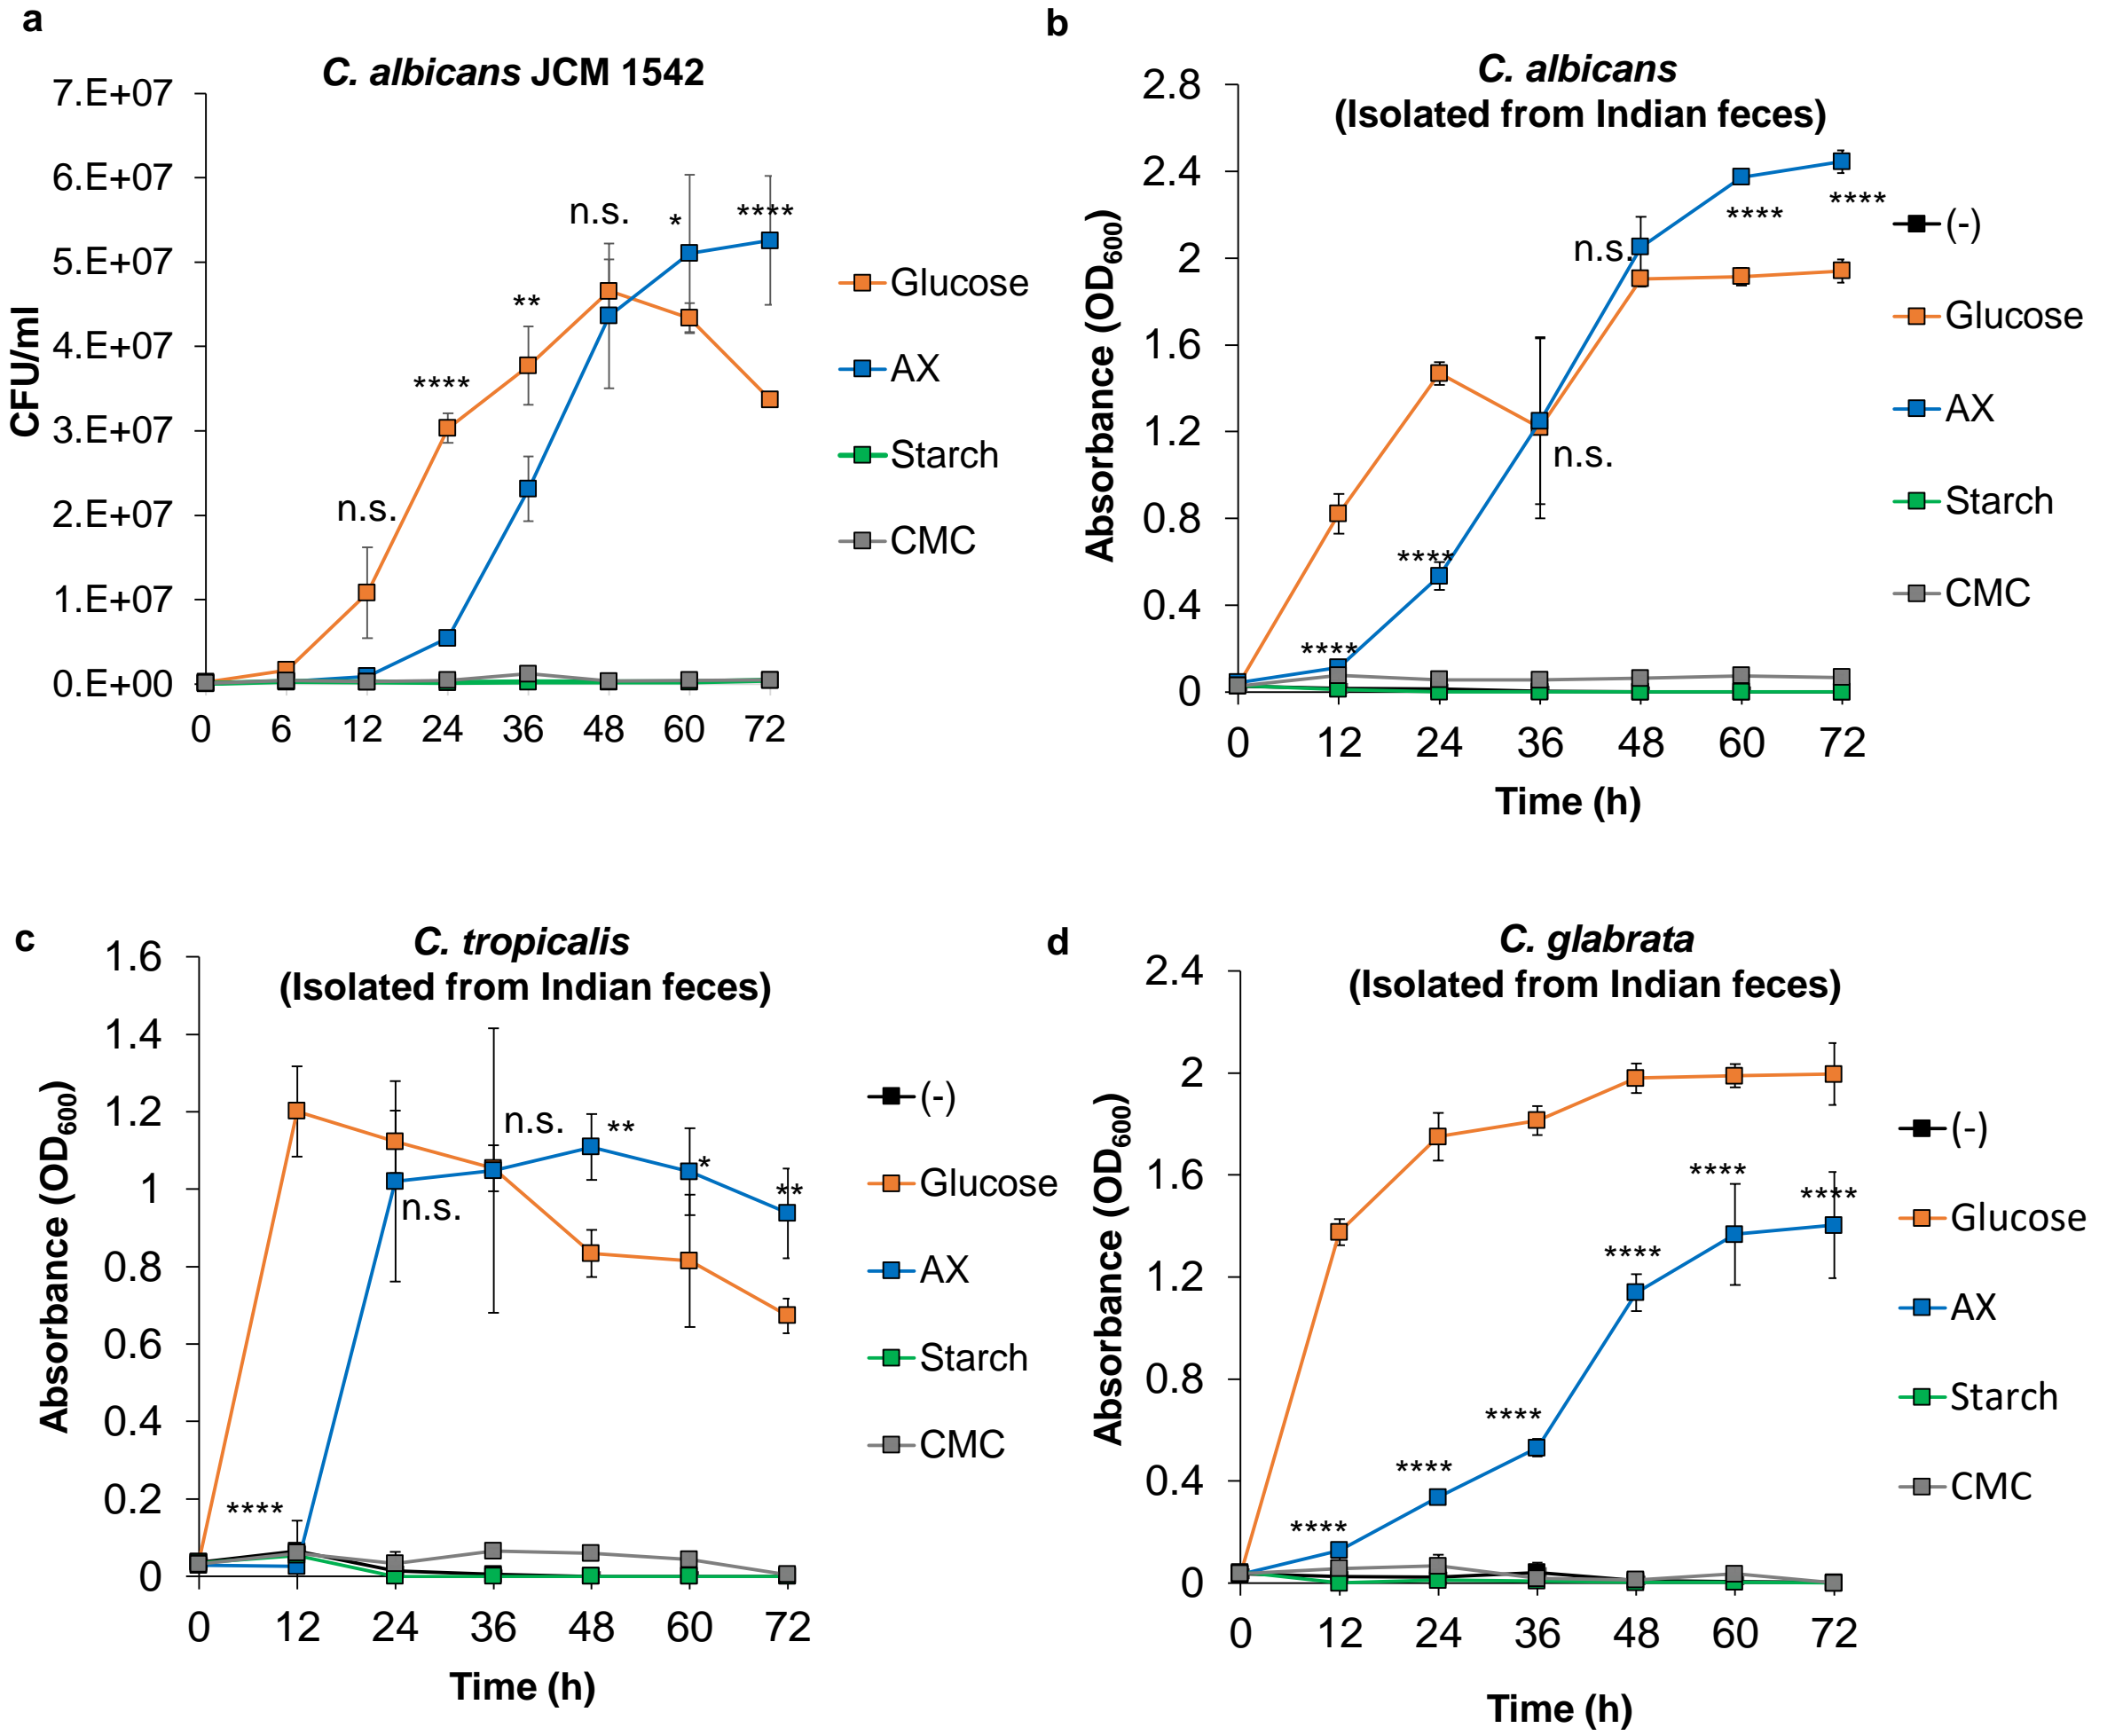

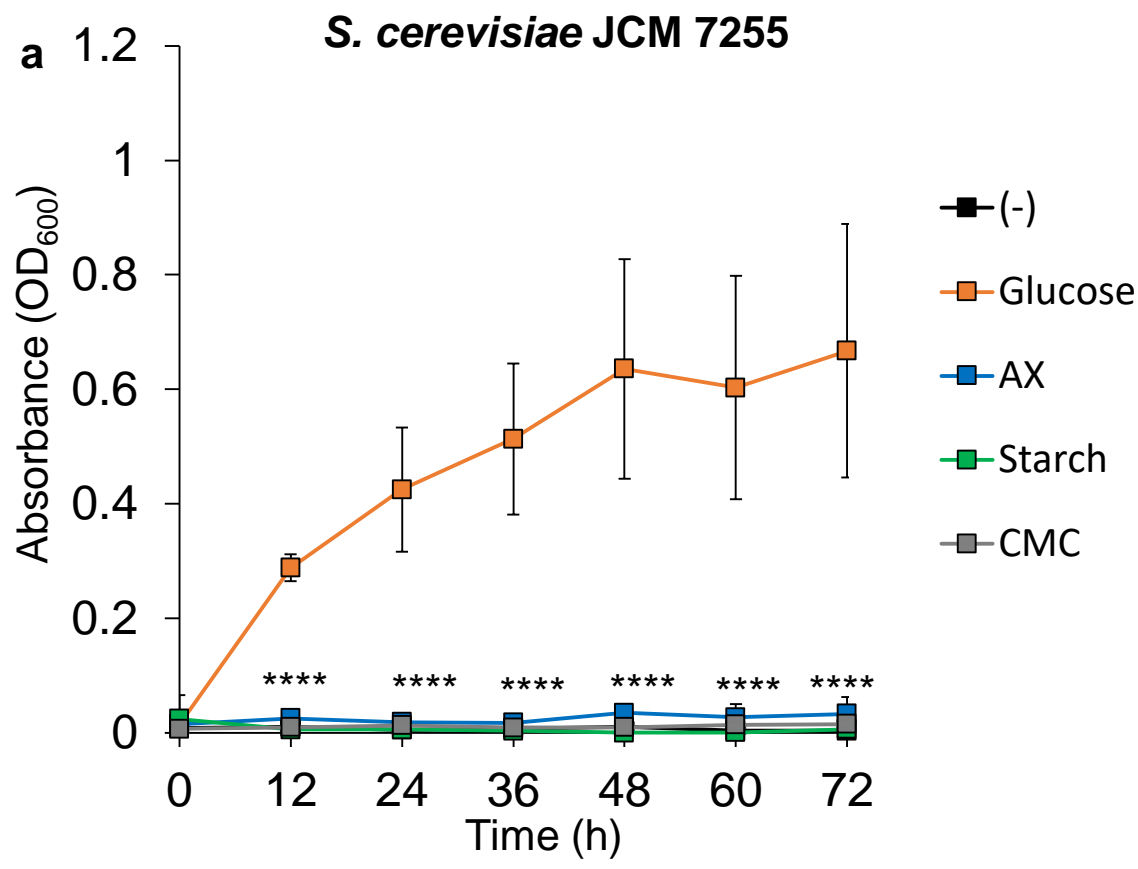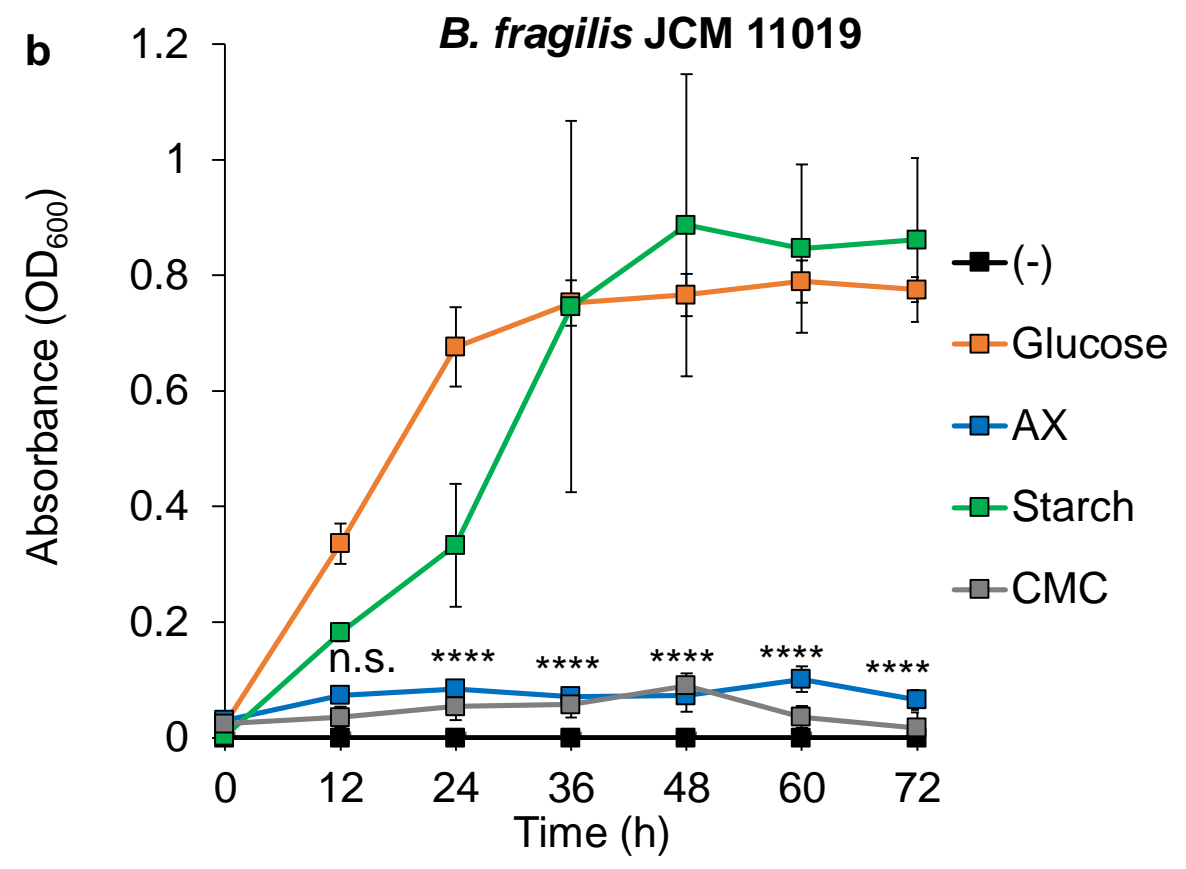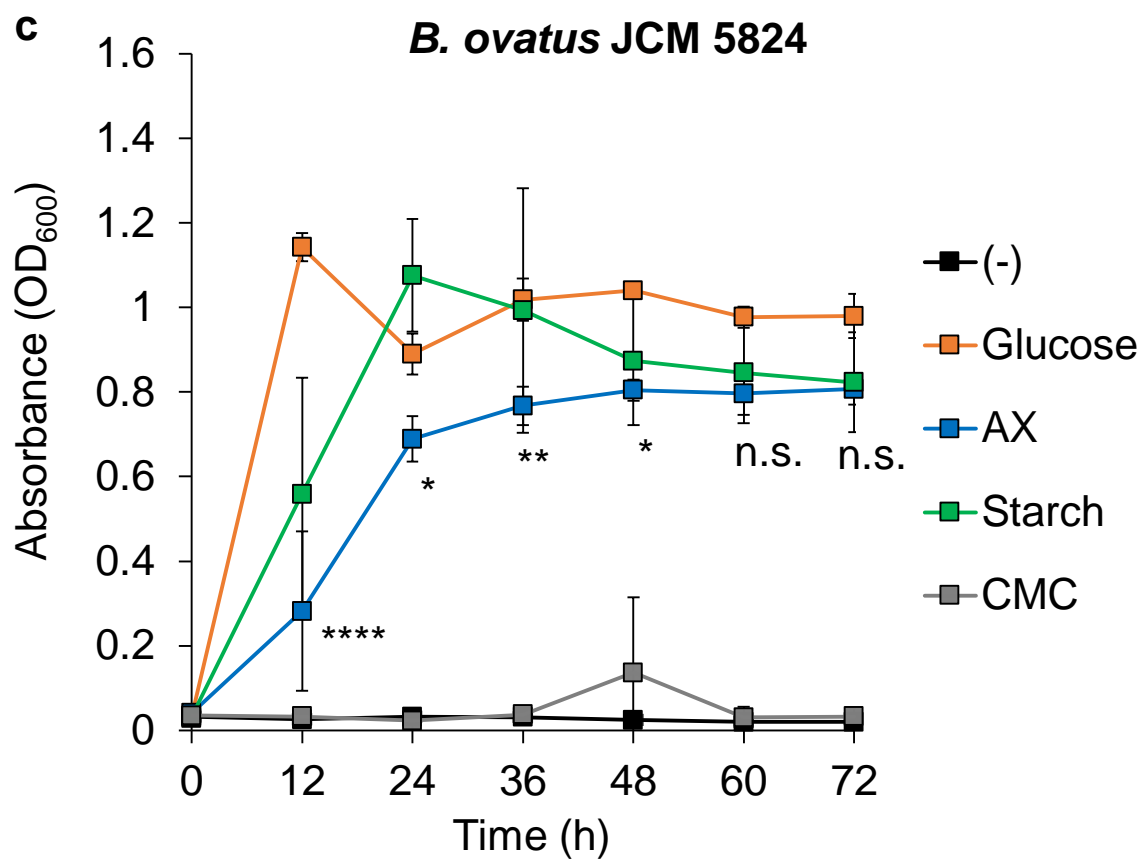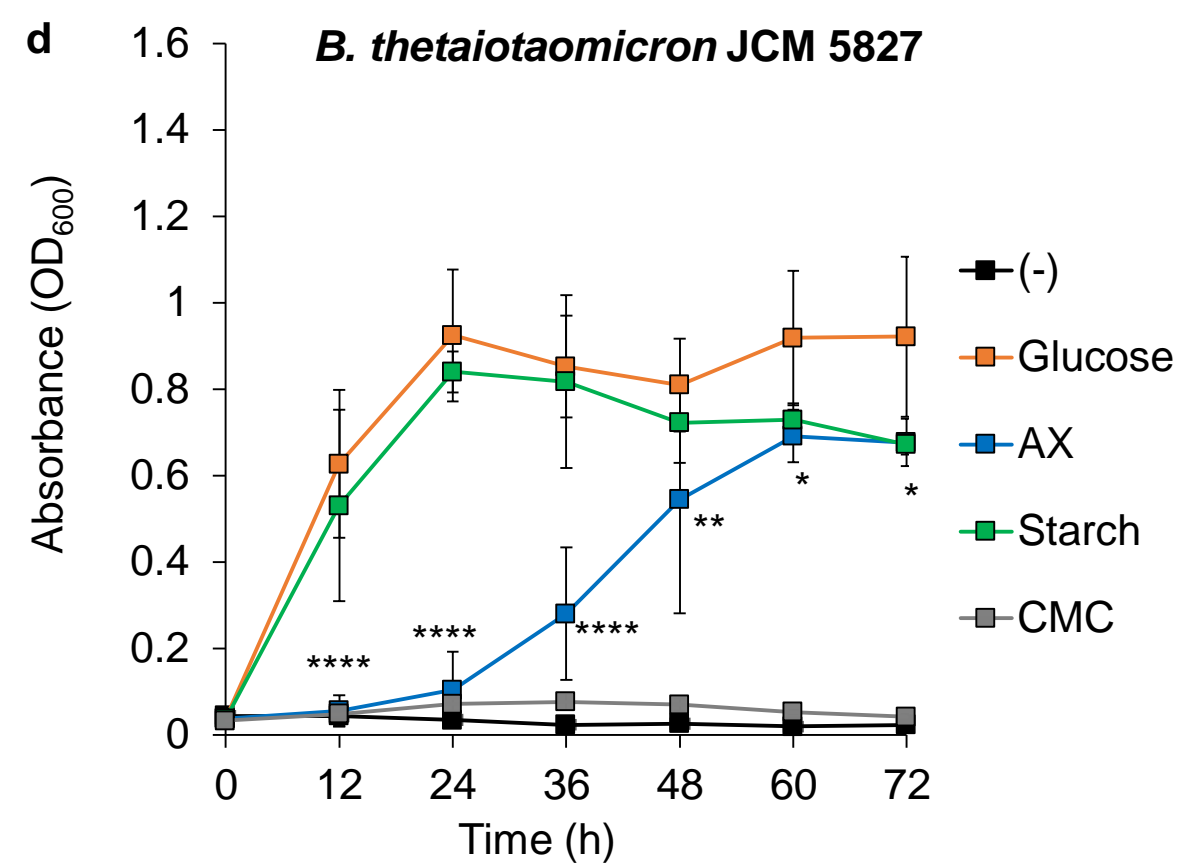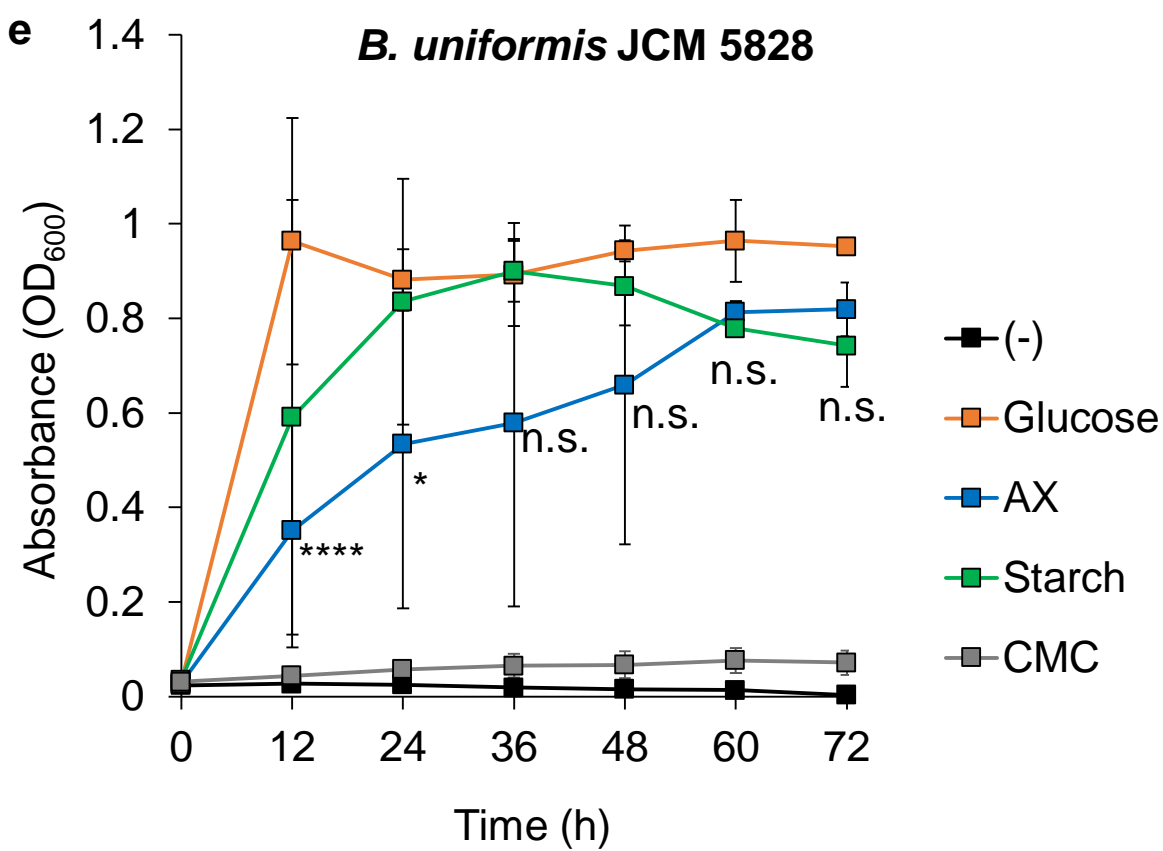

**a** *C. albicans*  
(Isolated from Indian feces)

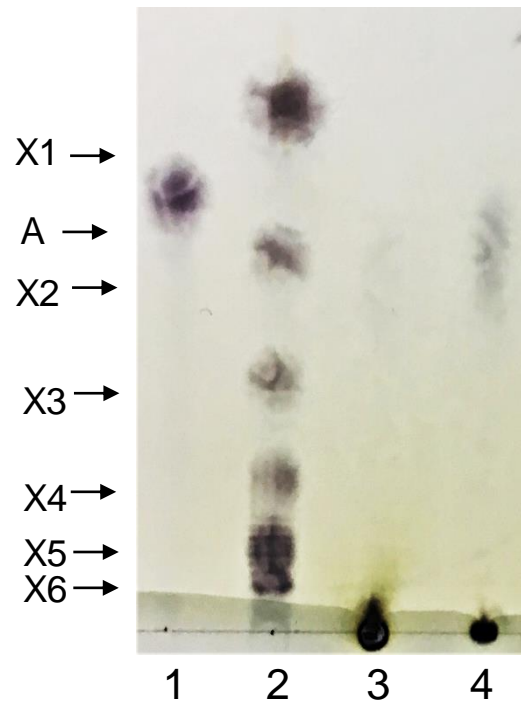

**b** *C. tropicalis* JCM 1541

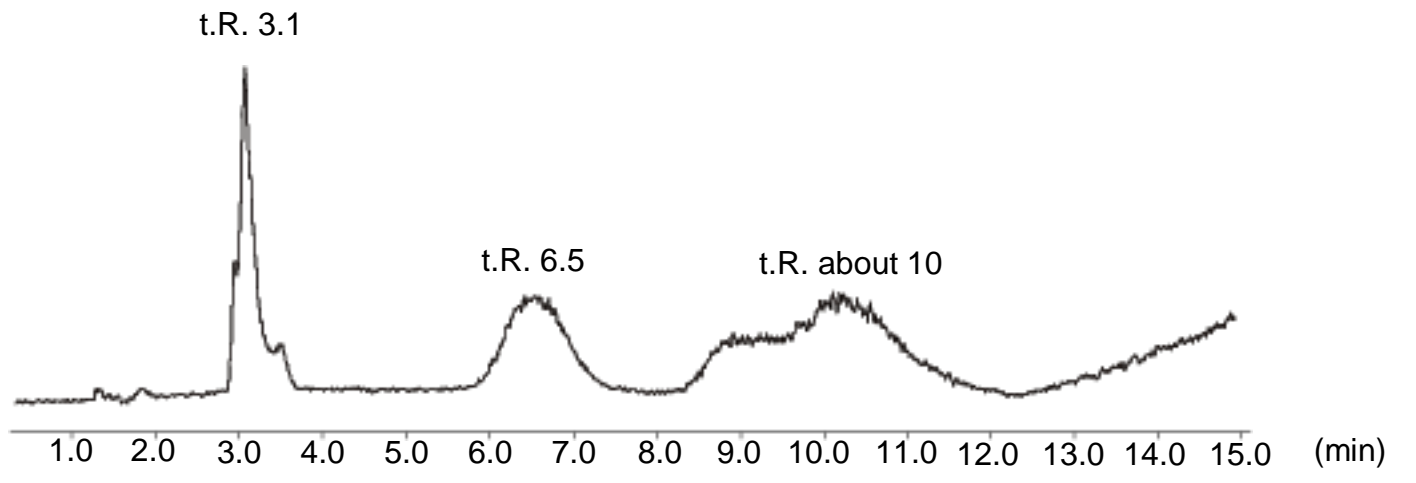

**c** *C. tropicalis* JCM 1541

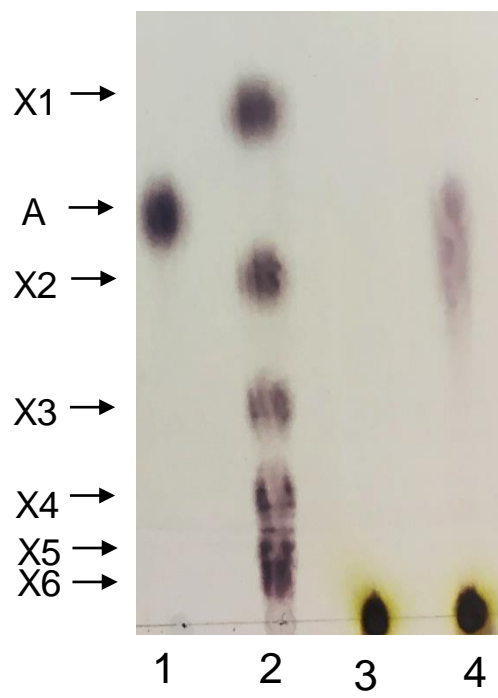

**d** *C. tropicalis*  
(Isolated from Indian feces)

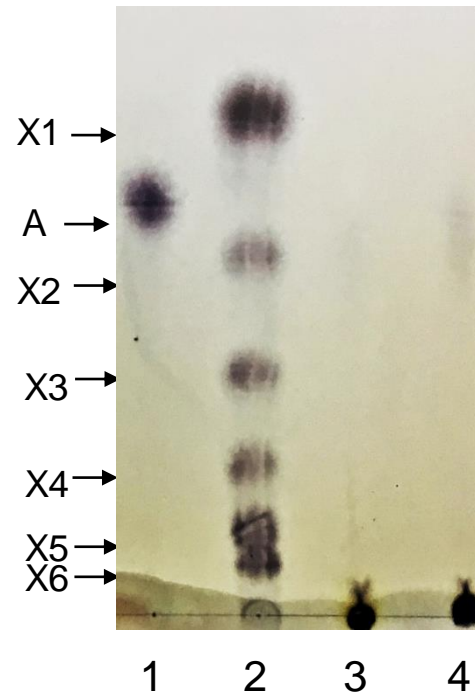

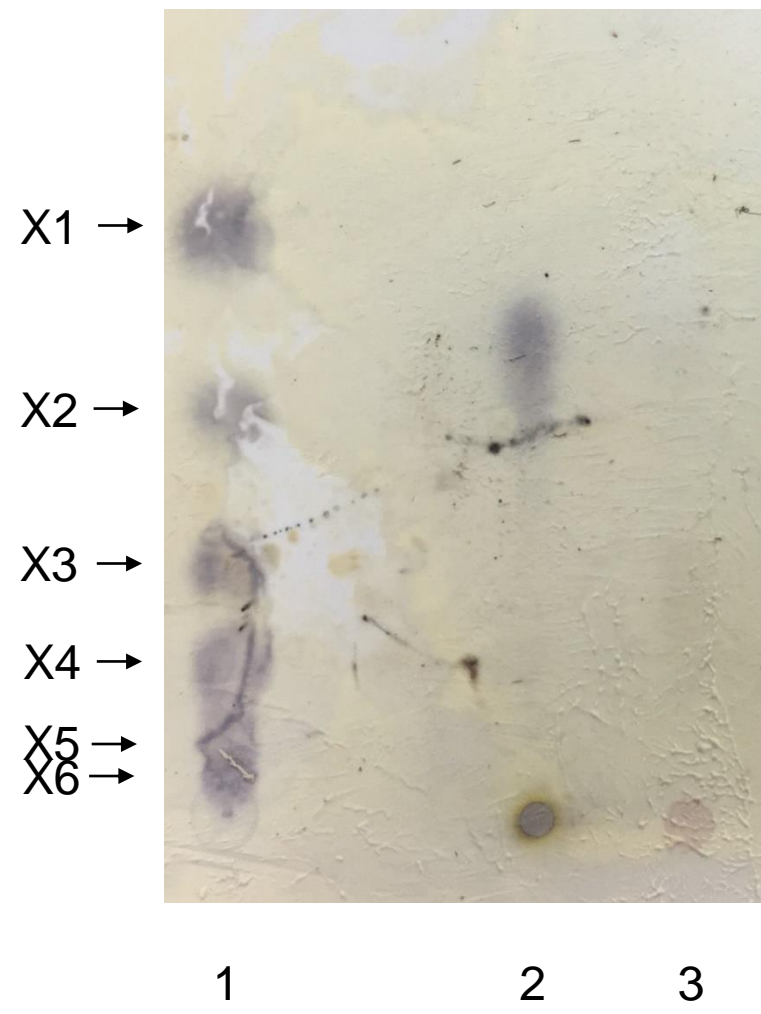

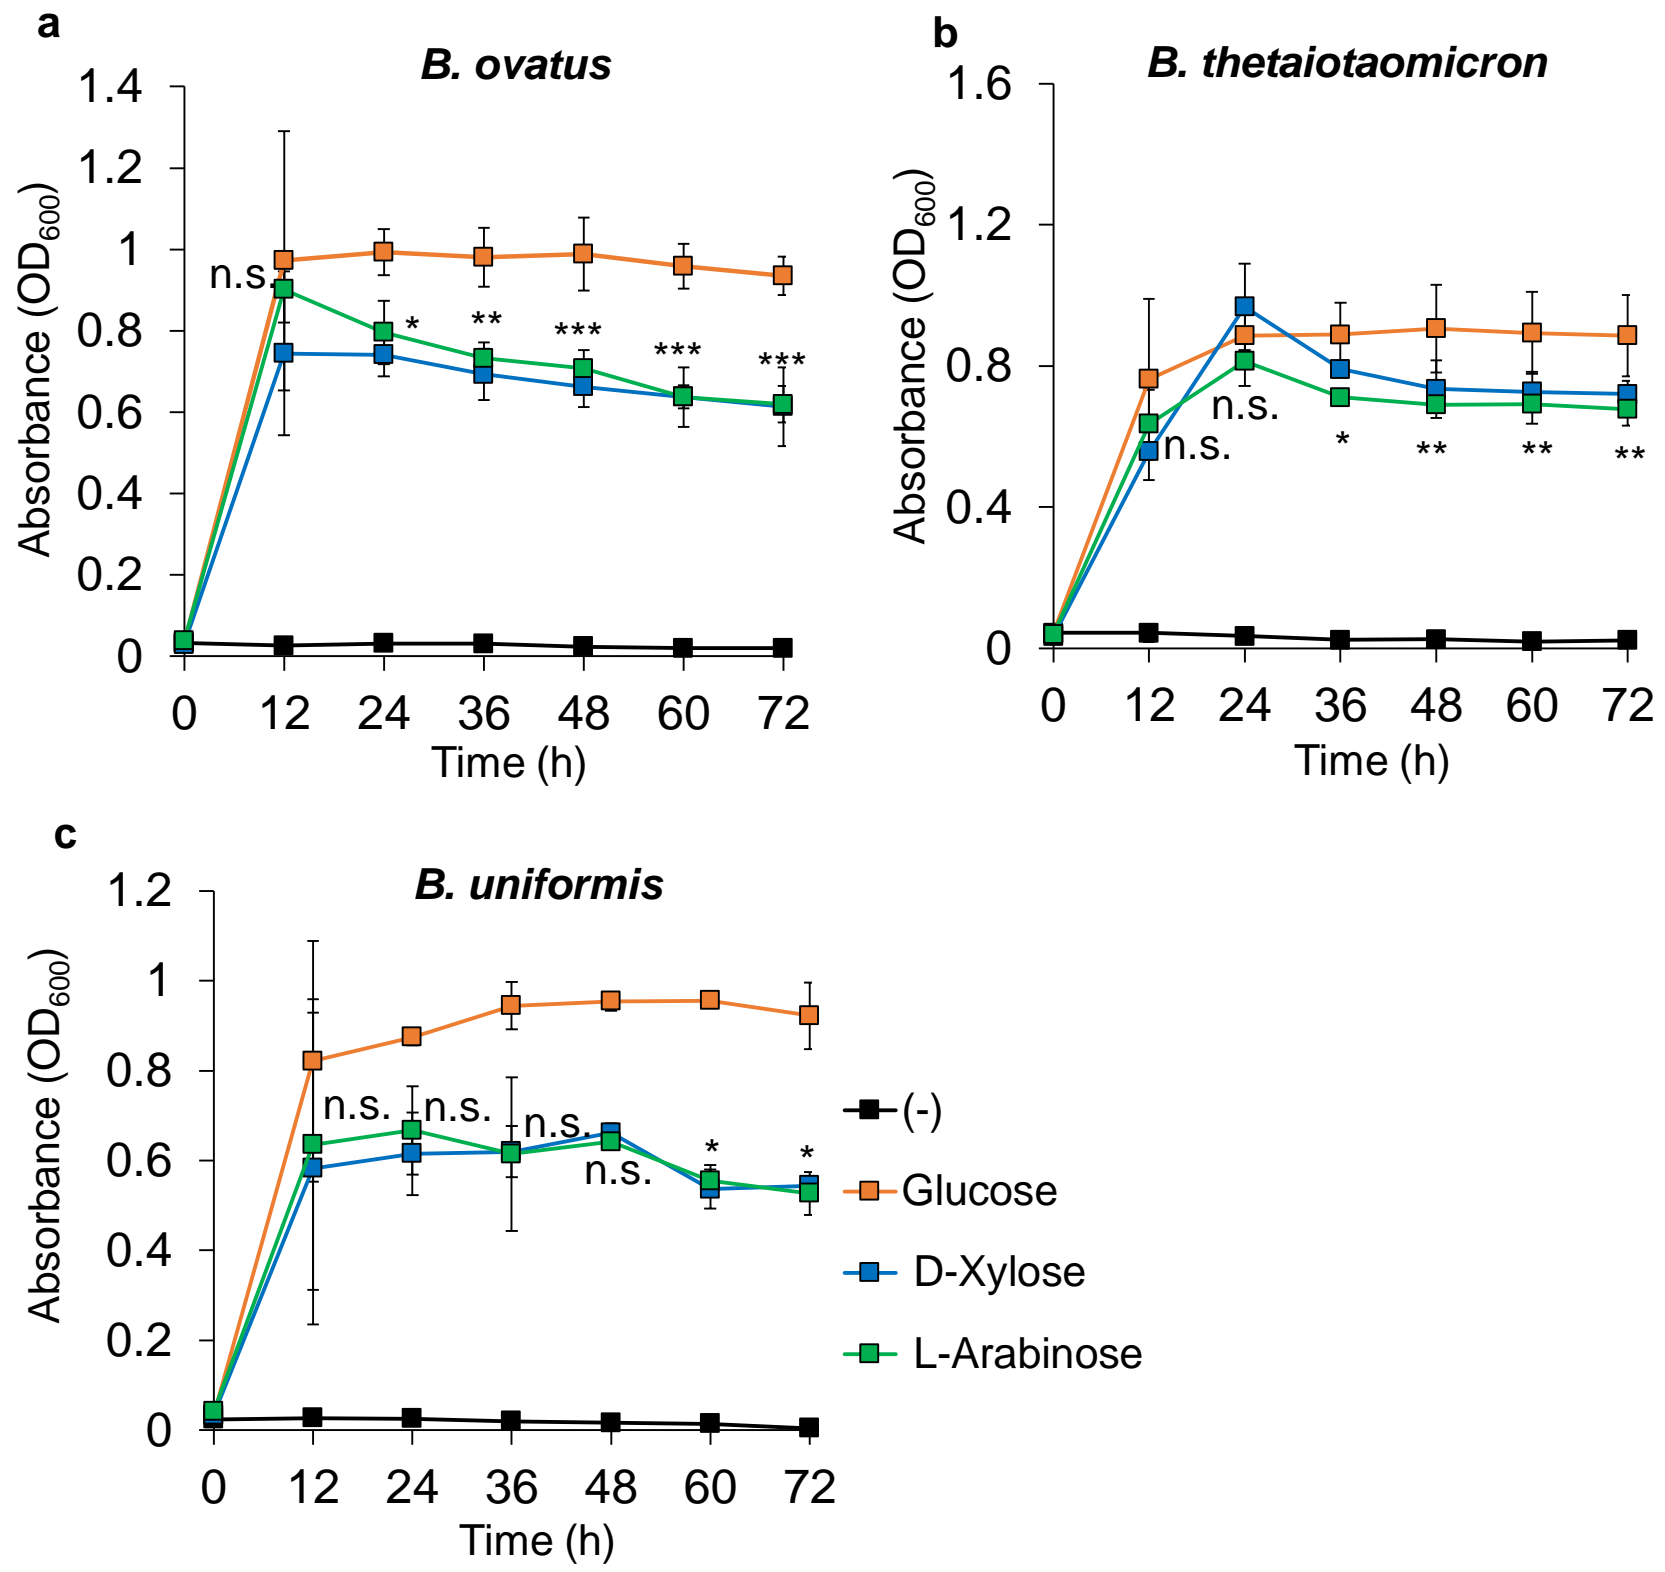



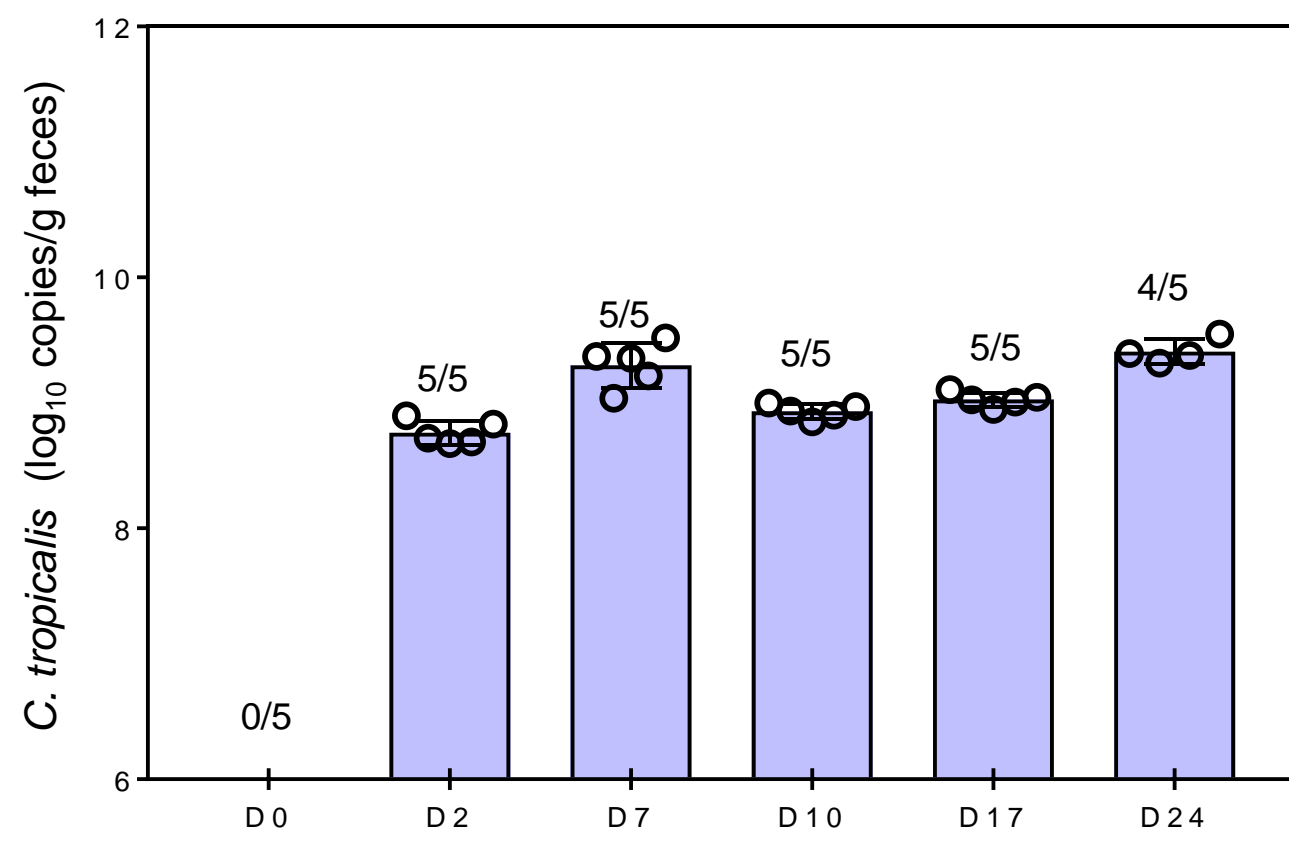

a

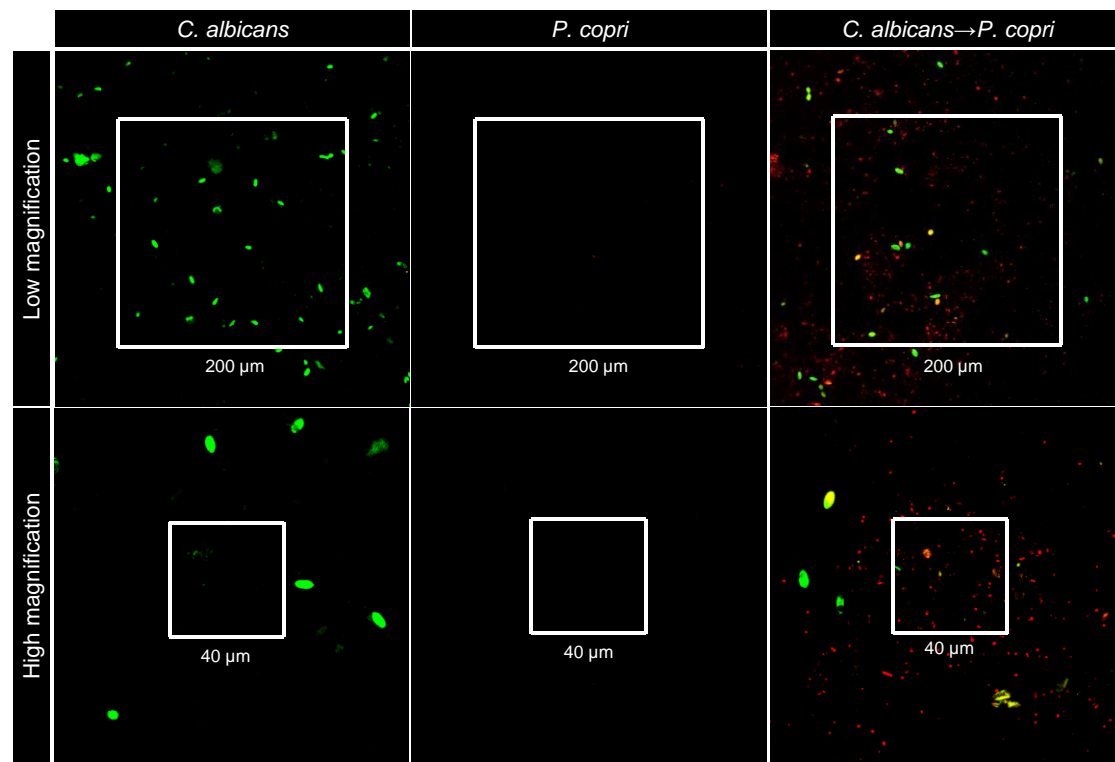

b

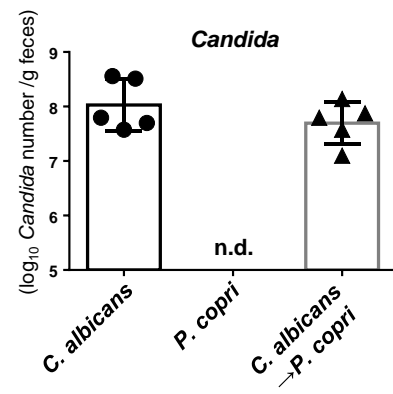

c

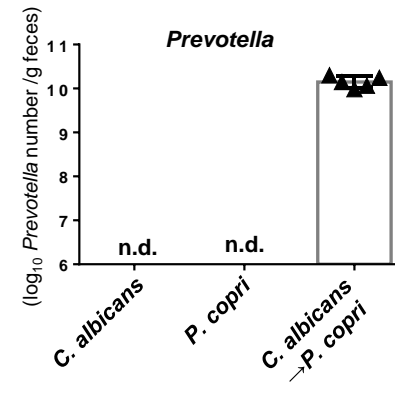

Supplement: 41522_2019_110_MOESM1_ESM.pdf [file 41522_2019_110_MOESM1_ESM.pdf]
